# Supplementary material
Source: Springer Nature journal article supplement (https://www.springermedizin.de/resource/supplementary/13048_2010_47_MOESM5_ESM.pdf/9664780)

**(a) IOSE-29**

**DAPI**

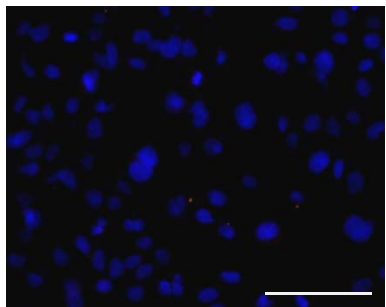

**$\beta$ -actin**

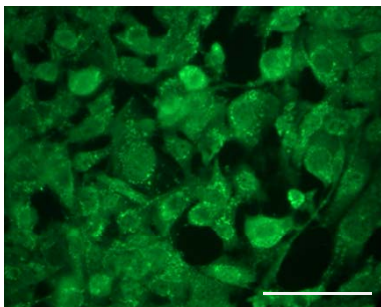

**Brn-3a**

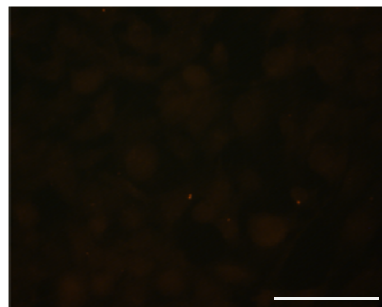

**Merged Brn-3a and  
DAPI**

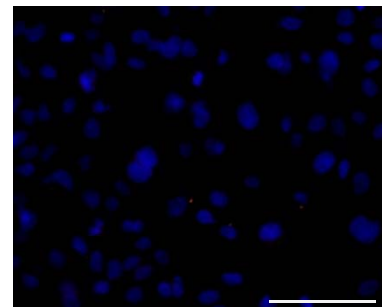

**(b) IOSE-80**

**DAPI**

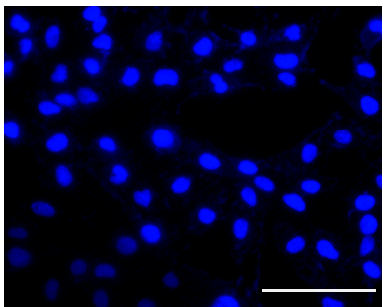

**$\beta$ -actin**

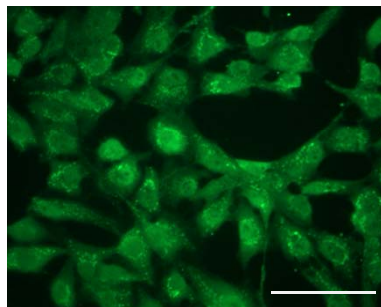

**Brn-3a**

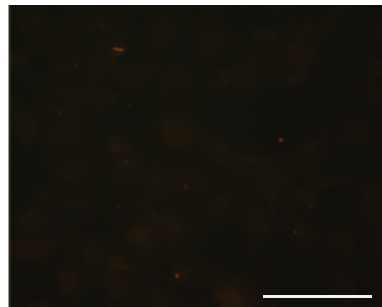

**Merged Brn-3a and  
DAPI**

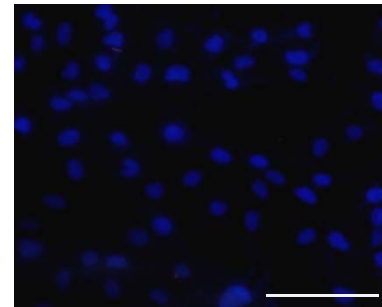

Supplement: MOESM5 [file 9664780]
